# Supplementary material for: HLA-B and TIMP1 as hub genes of the ventricular remodeling caused by hypertension.
Source: publisher site journal article supplement (doi:10.18632/aging.205816), 2024-05-09
Supplement: Supplementary file [file aging-v16i9-205816-supplementary-material-SD2.pdf]

## SUPPLEMENTARY TABLES

**Supplementary Table 1. Primers and their sequences for RT-PCR analysis.**

| <b>Primer</b> | <b>Sequence (5'–3')</b> |
|---------------|-------------------------|
| HLA-B-hF      | GAACACACAGATCTACAAGGCC  |
| HLA-B-hR      | CGTAGGCGTACTGGTCATGC    |
| TIMP1-hF      | CAATTCCGACCTCGTCATCAG   |
| TIMP1-hR      | GGTTGTGGGACCTGTGGAAGTA  |

HLA, Human leukocyte antigen; TIMPs, Tissue inhibitor of matrix metalloproteinases.

**Supplementary Table 2. The genes and their effect on ventricular remodeling based on univariate logistic proportional regression analysis.**

| <b>GENE</b> | <b>OR</b> | <b>95% CI</b>   | <b>P</b> |
|-------------|-----------|-----------------|----------|
| HLA-B       | 12.996    | 1.234 - 136.895 | 0.033    |

HLA, Human leukocyte antigen; OR, odds ratio; 95% CI, 95% confidence interval.

**Supplementary Table 3. Based information of participants with hypertension.**

| Characteristics                                      |    | Ventricular remodeling |                | P     |
|------------------------------------------------------|----|------------------------|----------------|-------|
|                                                      |    | No (%)                 | Yes (%)        |       |
| Sex                                                  |    |                        |                | 0.237 |
| Male                                                 | 10 | 4 (28.6%)              | 6 (42.9%)      |       |
| Female                                               | 4  | 3 (21.4%)              | 1 (7.1%)       |       |
| Age (years)                                          | 14 | 66.571±15.361          | 70.857±6.122   | 0.506 |
| Smoke                                                |    |                        |                | 0.577 |
| No                                                   | 9  | 5 (35.7%)              | 4 (28.6%)      |       |
| Yes                                                  | 5  | 2 (14.3%)              | 3 (21.4%)      |       |
| Drinking                                             |    |                        |                | 1.000 |
| No                                                   | 10 | 5 (35.7%)              | 5 (35.7%)      |       |
| Yes                                                  | 4  | 2 (14.3%)              | 2 (14.3%)      |       |
| Treatment with beta blockers                         |    |                        |                | 0.515 |
| No                                                   | 3  | 2 (14.3%)              | 1 (7.1%)       |       |
| Yes                                                  | 11 | 5 (35.7%)              | 6 (42.9%)      |       |
| Treatment with aldosterone receptor antagonist (MRA) |    |                        |                | 1.000 |
| No                                                   | 6  | 3 (21.4%)              | 3 (21.4%)      |       |
| Yes                                                  | 8  | 4 (28.6%)              | 4 (28.6%)      |       |
| Treatment with ACEI/ARB                              |    |                        |                | 0.237 |
| No                                                   | 10 | 6 (42.9%)              | 4 (28.6%)      |       |
| Yes                                                  | 4  | 1 (7.1%)               | 3 (21.4%)      |       |
| Treatment with <b>ARNI</b>                           |    |                        |                | 1.000 |
| No                                                   | 10 | 5 (35.7%)              | 5 (35.7%)      |       |
| Yes                                                  | 4  | 2 (14.3%)              | 2 (14.3%)      |       |
| Whether have hypertension                            |    |                        |                | 1.000 |
| No                                                   | 0  | 0 (0.0%)               | 0 (0.0%)       |       |
| Yes                                                  | 14 | 7 (50%)                | 7 (50%)        |       |
| Systolic pressure (mmHg)                             | 14 | 138.714±22.962         | 141.143±14.634 | 0.817 |
| Diastolic pressure (mmHg)                            | 14 | 84.429±7.786           | 79.429±7.721   | 0.251 |
| Mean arterial pressure (mmHg)                        | 14 | 102.52±10.65           | 100.00±7.53    | 0.539 |
| Ejection fraction (%)                                | 14 | 51.57±11.31            | 52.86±10.68    | 0.973 |
| LVEDD (mm)                                           | 14 | 53.86±8.82             | 53.29±6.21     | 0.398 |
| LVPWT (mm)                                           | 14 | 10.57±1.81             | 10.29±0.76     | 0.083 |
| IVST (mm)                                            | 14 | 11.71±2.93             | 10.43±1.90     | 0.576 |

Fisher's Exact Test was used for categorical variable, independent-samples T test (student's t-test) for continuous variable. P-values refer to the significance between ventricular remodeling and different characteristics. LVEDD: left ventricular end-diastolic dimension; LVPWT: Left Ventricular Posterior Wall Thickness; IVST: interventricular septum thickness.

**Supplementary Table 4. A summary of connectivity map that may regulate HLA-B.**

|    | <b>cmap name</b> | <b>mean</b> | <b>n</b> | <b>enrichment</b> | <b>p</b> |
|----|------------------|-------------|----------|-------------------|----------|
| 1  | isoflupredone    | -0.818      | 3        | -0.945            | 0.00028  |
| 2  | Gly-His-Lys      | -0.8        | 3        | -0.921            | 0.00084  |
| 3  | ciclacillin      | 0.806       | 4        | 0.829             | 0.00131  |
| 4  | thiamphenicol    | -0.73       | 5        | -0.748            | 0.00188  |
| 5  | ethisterone      | -0.496      | 6        | -0.688            | 0.0022   |
| 6  | adiphenine       | -0.44       | 5        | -0.704            | 0.00501  |
| 7  | verteporfin      | 0.778       | 3        | 0.861             | 0.00503  |
| 8  | amantadine       | -0.734      | 4        | -0.775            | 0.00527  |
| 9  | acepromazine     | 0.746       | 4        | 0.769             | 0.00553  |
| 10 | timolol          | -0.751      | 4        | -0.771            | 0.00557  |

HLA, Human leukocyte antigen.
